# Supplementary material for: SIX1 Down-Regulation Influence Drug Resistance, Epithelial-Mesenchymal Transcription Factors and Self-Renewal Capacity in Hepatocellular Carcinoma
Source: Research Square preprint supplement (doi:10.21203/rs.3.rs-376584/v1), 2021-04-29
Supplement: Supplementary file 1 [file d33ee90058dd8ac8e1d1225c.docx]

| **Gene** | **F(5’-3’)** | **R(5’-3’)** |
| --- | --- | --- |
| ***SIX1*** | AAAGGGAAGGAGAACAAGGATAG | AGCCTACATGATTACTGGGATTT |
| ***ZEB2*** | CAAGGAGCAGGTAATCGCAAGT | GGAACCAGAATGGGAGAAACG |
| ***ZEB1*** | GATCAAAGACATGTGACGCAG | TGTGTGAGCTATAGGAGCCAG |
| ***EYA2*** | CAGAGTGGATTCCTCAGCTATG | CCTCCTTGATAGAACCCTGTTG |
| ***ITGB1*** | ATCCCATTGACCTCTACTACCT | GTCCGAAGTAATCCTCCTCATTT |
| ***ITGA5*** | GGTGGACCAGGAAGCTATTT | GAACCAGGTTGATCAGGTACTC |
| ***ABCG2*** | ATGGATTTACGGCTTTGCAG | GAGATCGATGCCCTGCTTTA |
| ***ABCC1*** | CAAGTCATCCTTGCTCTCTAC | CACCTGATACGTCTTGGTCTT |
| ***ABCB1*** | TGCTGGTTGCTGCTTACA | GCCTATCTCCTGTCGCATTATAG |
| ***EPCAM*** | GGATCTGGATCCTGGTCAAAC | GCTATCACCACAACCACAATAAC |
| ***TWIST1*** | CCGGAGACCTAGATGTCATTG | CACGCCCTGTTTCTTTGAAT |
| ***SOX2*** | AGCTACAGCATGATGCAGGA | GGTCATGGAGTTGTACTGCA |
| ***VIM*** | GCAGGAGGAGATGCTTCAGA | ATTCCACTTTGCGTTCAAGG |
| ***THY1*** | GTCCTTTCTCCCCCAATCTC | ACGAAGGCTCTGGTCCACTA |
| ***KLF4*** | TCTCAAGGCACACCTGCGAA | TAGTGCCTGGTCAGTTCATC |
| ***GAPDH*** | GGCTGAGAACGGGAAGCTTGTCAT | CAGCCTTCTCCATGGTGGTGAAGA |

**Table 1.** List of primers for real-time quantitative PCR
